# Supplementary material for: Investigation the effect of jujube seed capsule on sleep quality of postmenopausal women: A double-blind randomized clinical trial
Source: PubMed Central journal article supplement (PMC7735973; doi:10.37796/2211-8039.1038), 2020-12-01
Supplement: bmed-10-04-042-s003.pdf [file bmed-10-04-042-s003.pdf]

**BioMedicine**  
AUTHORSHIP STATEMENT

Article \_\_\_\_\_

---

All persons who meet authorship criteria are listed as authors, and all authors certify that they have participated sufficiently in the work to take public responsibility for the content, including participation in the concept, design, analysis, writing, or revision of the manuscript. Furthermore, each author certifies that this material or similar material has not been and will not be submitted to or published in any other publication before its appearance in BioMedicine.

**Authorship contributions**

Please indicate the specific contributions made by each author (list the authors' initials followed by their surnames, e.g., Y.L. Chang). The name of each author must appear at least once in each of the three categories below.

**Category 1**

Conception and design of study: \_\_\_\_\_, \_\_\_\_\_,  
\_\_\_\_\_, \_\_\_\_\_; \_\_\_\_\_;  
acquisition of data: \_\_\_\_\_, \_\_\_\_\_,  
\_\_\_\_\_, \_\_\_\_\_; \_\_\_\_\_;  
analysis and/or interpretation of data: \_\_\_\_\_, \_\_\_\_\_,  
\_\_\_\_\_, \_\_\_\_\_; \_\_\_\_\_;

**Category 2**

Drafting the manuscript: \_\_\_\_\_, \_\_\_\_\_,  
\_\_\_\_\_, \_\_\_\_\_;  
revising the manuscript critically for important intellectual content:  
\_\_\_\_\_, \_\_\_\_\_,  
\_\_\_\_\_, \_\_\_\_\_.

**Category 3**

Approval of the version of the manuscript to be published (the names of all authors must be listed):

\_\_\_\_\_, \_\_\_\_\_, \_\_\_\_\_, \_\_\_\_\_,  
\_\_\_\_\_, \_\_\_\_\_, \_\_\_\_\_, \_\_\_\_\_,  
\_\_\_\_\_, \_\_\_\_\_, \_\_\_\_\_, \_\_\_\_\_,  
\_\_\_\_\_, \_\_\_\_\_, \_\_\_\_\_, \_\_\_\_\_.

**Acknowledgments**

All persons who have made substantial contributions to the work reported in the manuscript (e.g., technical help, writing and editing assistance, general support), but who do not meet the criteria for authorship, are named in the Acknowledgments and have given us their written permission to be named. If we have not included an Acknowledgments, then that indicates that we have not received substantial contributions from non-authors.

This statement is signed by all the authors (a photocopy of this form may be used if there are more than 10 authors):

Author's name (typed) Author's signature Date

\_\_\_\_\_  
\_\_\_\_\_

---

---

---

---

---

---

Corresponding author declaration

I [  ], the corresponding author of this manuscript, certify that the contributors' and conflicts of interest statements included in this paper are correct and have been approved by all co-authors
